# Supplementary material
Source: ML conference proceedings conference paper supplement (https://proceedings.neurips.cc/paper_files/paper/2019/hash/13e5ebb0fa112fe1b31a1067962d74a7-Abstract.html)
Supplement: Supplementary file [file 13e5ebb0fa112fe1b31a1067962d74a7-Supplemental.zip]

# 1 Appendix

## 1.1 Proof of the Optimality Condition for $q_\theta$

In pLogicNet, we use a mean-field variational distribution  $q_\theta(\mathbf{v}_H)$  to approximate the true posterior distribution  $p_w(\mathbf{v}_H|\mathbf{v}_O)$ . In this section, we prove that the optimal variational distribution is given by the following fixed-point condition:

$$q_\theta(\mathbf{v}_H) = \prod_{(h,r,t) \in H} q_\theta(\mathbf{v}_{(h,r,t)}) = \prod_{(h,r,t) \in H} \text{Ber}(\mathbf{v}_{(h,r,t)} | f(\mathbf{x}_h, \mathbf{x}_r, \mathbf{x}_t)), \quad (1)$$

To prove the claim, recall that our goal for  $q_\theta$  is to minimize the KL divergence between  $q_\theta(\mathbf{v}_H)$  and  $p_w(\mathbf{v}_H|\mathbf{v}_O)$ . If we consider each individual indicator variable  $\mathbf{v}_{(h,r,t)}$ , the objective function for  $q_\theta(\mathbf{v}_{(h,r,t)})$  is given as follows:

$$\begin{aligned} O(q_\theta(\mathbf{v}_{(h,r,t)})) &= -\text{KL}(q_\theta(\mathbf{v}_H) || p_w(\mathbf{v}_H|\mathbf{v}_O)) = \sum_{\mathbf{v}_H} q_\theta(\mathbf{v}_H) [\log p_w(\mathbf{v}_H|\mathbf{v}_O) - \log q_\theta(\mathbf{v}_H)] \\ &= \sum_{\mathbf{v}_H} \prod_{(h',r',t') \in H} q_\theta(\mathbf{v}_{(h',r',t')}) \left[ \log p_w(\mathbf{v}_H, \mathbf{v}_O) - \sum_{(h',r',t') \in H} \log q_\theta(\mathbf{v}_{(h',r',t')}) \right] + \text{const} \\ &= \sum_{\mathbf{v}_{(h,r,t)}} \sum_{\mathbf{v}_{H \setminus (h,r,t)}} q_\theta(\mathbf{v}_{(h,r,t)}) \prod_{(h',r',t') \neq (h,r,t)} q_\theta(\mathbf{v}_{(h',r',t')}) \left[ \log p_w(\mathbf{v}_H, \mathbf{v}_O) - \sum_{(h',r',t') \in H} \log q_\theta(\mathbf{v}_{(h',r',t')}) \right] + \text{const} \\ &= \sum_{\mathbf{v}_{(h,r,t)}} q_\theta(\mathbf{v}_{(h,r,t)}) \sum_{\mathbf{v}_{H \setminus (h,r,t)}} \prod_{(h',r',t') \neq (h,r,t)} q_\theta(\mathbf{v}_{(h',r',t')}) \log p_w(\mathbf{v}_H, \mathbf{v}_O) - \\ &\quad \sum_{\mathbf{v}_{(h,r,t)}} q_\theta(\mathbf{v}_{(h,r,t)}) \sum_{\mathbf{v}_{H \setminus (h,r,t)}} \prod_{(h',r',t') \neq (h,r,t)} q_\theta(\mathbf{v}_{(h',r',t')}) \left[ \sum_{(h',r',t') \neq (h,r,t)} \log q_\theta(\mathbf{v}_{(h',r',t')}) + \log q_\theta(\mathbf{v}_{(h,r,t)}) \right] + \text{const} \\ &= \sum_{\mathbf{v}_{(h,r,t)}} q_\theta(\mathbf{v}_{(h,r,t)}) \log F(\mathbf{v}_{(h,r,t)}) - \sum_{\mathbf{v}_{(h,r,t)}} q_\theta(\mathbf{v}_{(h,r,t)}) \log q_\theta(\mathbf{v}_{(h,r,t)}) + \text{const} \\ &= -\text{KL} \left( q_\theta(\mathbf{v}_{(h,r,t)}) || \frac{F(\mathbf{v}_{(h,r,t)})}{Z} \right) + \text{const}. \end{aligned} \quad (2)$$

Here,  $Z$  is a normalization term, which makes  $F(\mathbf{v}_{(h,r,t)})$  a valid distribution on  $\mathbf{v}_{(h,r,t)}$ , and we have

$$\log F(\mathbf{v}_{(h,r,t)}) = \sum_{\mathbf{v}_{H \setminus (h,r,t)}} \prod_{(h',r',t') \neq (h,r,t)} q_\theta(\mathbf{v}_{(h',r',t')}) \log p_w(\mathbf{v}_H, \mathbf{v}_O) = \mathbb{E}_{q_\theta(\mathbf{v}_{H \setminus (h,r,t)})} [\log p_w(\mathbf{v}_H, \mathbf{v}_O)].$$

Based on the Eq.(2), the optimal  $q_\theta(\mathbf{v}_{(h,r,t)})$  is achieved when it equals to  $\frac{F(\mathbf{v}_{(h,r,t)})}{Z}$ , and thus we have:

$$\begin{aligned} \log q_\theta(\mathbf{v}_{(h,r,t)}) &= \log F(\mathbf{v}_{(h,r,t)}) + \text{const} = \mathbb{E}_{q_\theta(\mathbf{v}_{H \setminus (h,r,t)})} [\log p_w(\mathbf{v}_H, \mathbf{v}_O)] + \text{const} \\ &= \mathbb{E}_{q_\theta(\mathbf{v}_{H \setminus (h,r,t)})} [\log p_w(\mathbf{v}_{(h,r,t)} | \mathbf{v}_{O \cup H \setminus (h,r,t)})] + \text{const} \\ &= \mathbb{E}_{q_\theta(\mathbf{v}_{H \setminus (h,r,t)})} [\log p_w(\mathbf{v}_{(h,r,t)} | \mathbf{v}_{\text{MB}(h,r,t)})] + \text{const} \\ &= \mathbb{E}_{q_\theta(\mathbf{v}_{\text{MB}(h,r,t) \cap H})} [\log p_w(\mathbf{v}_{(h,r,t)} | \mathbf{v}_{\text{MB}(h,r,t)})] + \text{const}. \end{aligned}$$

Here,  $p_w(\mathbf{v}_{(h,r,t)} | \mathbf{v}_{O \cup H \setminus (h,r,t)}) = p_\phi(\mathbf{v}_{(h,r,t)} | \mathbf{v}_{\text{MB}(h,r,t)})$  is derived from the conditional independence property of Markov networks.

## 1.2 Derivative w.r.t. $w$ in the M Step

In pLogicNet, we optimize  $w$  through the gradient descent algorithm. For each expected conditional distribution  $\mathbb{E}_{q_\theta(\mathbf{v}_H)} [p(\mathbf{v}_{(h,r,t)} | \mathbf{v}_{\text{MB}(h,r,t)})]$ , suppose that  $\mathbf{v}_{(h,r,t)}$  connects with  $\mathbf{v}_{\text{MB}(ijk)}$  through a

18 set of rules. Then for each of such rules  $l$ , the derivative with respect to  $w_l$  is computed as:

$$\nabla_{w_l} \mathbb{E}_{q_\theta(\mathbf{v}_H)} [\log p(\mathbf{v}_{(h,r,t)} | \mathbf{v}_{\text{MB}(h,r,t)})] \simeq \begin{cases} 1 - p_w(\mathbf{v}_{(h,r,t)} = 1 | \hat{\mathbf{v}}_{\text{MB}(h,r,t)}) & \text{if } (h, r, t) \in O, \\ q_\theta(\mathbf{v}_{(h,r,t)} = 1) - p_w(\mathbf{v}_{(h,r,t)} = 1 | \hat{\mathbf{v}}_{\text{MB}(h,r,t)}) & \text{if } (h, r, t) \in H, \end{cases}$$

19 where  $\hat{\mathbf{v}}_{\text{MB}(h,r,t)} = \{\hat{\mathbf{v}}_{(h',r',t')}\}_{(h',r',t') \in \text{MB}(h,r,t)}$  is a sample from  $q_\theta$ . For each  $(h', r', t') \in$   
 20  $\text{MB}(h, r, t)$ ,  $\hat{\mathbf{v}}_{(h',r',t')} = 1$  if  $(h', r', t')$  is observed, and otherwise  $\hat{\mathbf{v}}_{(h',r',t')} \sim q_\theta(\mathbf{v}_{(h',r',t')})$ .

21 Next, we prove the above claim. Specifically, we consider a logic rule  $l$  connecting  $\mathbf{v}_{(h,r,t)}$  with  
 22  $\mathbf{v}_{\text{MB}(h,r,t)}$ , then we discuss two cases, i.e.,  $(h, r, t) \in O$  and  $(h, r, t) \in H$ .

23 **Case 1:  $(h, r, t)$  is an observed triplet.**

24 Since  $(h, r, t) \in O$ , we have  $\mathbb{E}_{q_\theta(\mathbf{v}_H)} [\log p(\mathbf{v}_{(h,r,t)} | \mathbf{v}_{\text{MB}(h,r,t)})] \simeq \log p(\mathbf{v}_{(h,r,t)} = 1 | \hat{\mathbf{v}}_{\text{MB}(h,r,t)})$ ,  
 25 where  $\hat{\mathbf{v}}_{\text{MB}(h,r,t)}$  is defined in the above paragraphs, and  $p(\mathbf{v}_{(h,r,t)} = 1 | \hat{\mathbf{v}}_{\text{MB}(h,r,t)})$  is computed as:

$$\begin{aligned} p(\mathbf{v}_{(h,r,t)} = 1 | \hat{\mathbf{v}}_{\text{MB}(h,r,t)}) &= \frac{p(\mathbf{v}_{(h,r,t)} = 1, \hat{\mathbf{v}}_{\text{MB}(h,r,t)})}{p(\mathbf{v}_{(h,r,t)} = 1, \hat{\mathbf{v}}_{\text{MB}(h,r,t)}) + p(\mathbf{v}_{(h,r,t)} = 0, \hat{\mathbf{v}}_{\text{MB}(h,r,t)})} \\ &= \frac{\exp(w_l + b)}{\exp(w_l + b) + 1} = \sigma(w_l + b). \end{aligned} \quad (3)$$

26 Here,  $b$  is a term which does not depend on  $w_l$ , and  $\sigma$  is the sigmoid function, i.e.,  $\sigma(x) = \frac{1}{1+\exp(-x)}$ .

27 Based on that, the derivative with respect to  $w_l$  is computed as:

$$\begin{aligned} \nabla_{w_l} \mathbb{E}_{q_\theta(\mathbf{v}_H)} [\log p(\mathbf{v}_{(h,r,t)} | \mathbf{v}_{\text{MB}(h,r,t)})] &\simeq \nabla_{w_l} \log p(\mathbf{v}_{(h,r,t)} = 1 | \hat{\mathbf{v}}_{\text{MB}(h,r,t)}) = \nabla_{w_l} \log \sigma(w_l + b) \\ &= \frac{\nabla_{w_l} \sigma(w_l + b)}{\sigma(w_l + b)} = \frac{\sigma(w_l + b)(1 - \sigma(w_l + b))}{\sigma(w_l + b)} = 1 - \sigma(w_l + b) = 1 - p(\mathbf{v}_{(h,r,t)} = 1 | \hat{\mathbf{v}}_{\text{MB}(h,r,t)}). \end{aligned} \quad (4)$$

28 **Case 2:  $(h, r, t)$  is a hidden triplet.**

29 Since  $(h, r, t) \in H$ , we have  $\mathbb{E}_{q_\theta(\mathbf{v}_H)} [\log p(\mathbf{v}_{(h,r,t)} | \mathbf{v}_{\text{MB}(h,r,t)})] \simeq$   
 30  $\mathbb{E}_{q_\theta(\mathbf{v}_{(h,r,t)})} [\log p(\mathbf{v}_{(h,r,t)} | \hat{\mathbf{v}}_{\text{MB}(h,r,t)})]$ , where  $\hat{\mathbf{v}}_{\text{MB}(h,r,t)}$  is defined in the above paragraphs,  
 31 and  $p(\mathbf{v}_{(h,r,t)} = 1 | \hat{\mathbf{v}}_{\text{MB}(h,r,t)})$  is computed as:

$$\begin{aligned} p(\mathbf{v}_{(h,r,t)} = 1 | \hat{\mathbf{v}}_{\text{MB}(h,r,t)}) &= \frac{p(\mathbf{v}_{(h,r,t)} = 1, \hat{\mathbf{v}}_{\text{MB}(h,r,t)})}{p(\mathbf{v}_{(h,r,t)} = 1, \hat{\mathbf{v}}_{\text{MB}(h,r,t)}) + p(\mathbf{v}_{(h,r,t)} = 0, \hat{\mathbf{v}}_{\text{MB}(h,r,t)})} \\ &= \frac{\exp(w_l + b)}{\exp(w_l + b) + 1} = \sigma(w_l + b). \end{aligned} \quad (5)$$

32 Here,  $b$  is a term which does not depend on  $w_l$ , and  $\sigma$  is the sigmoid function, i.e.,  $\sigma(x) = \frac{1}{1+\exp(-x)}$ .

33 Based on that, the derivative with respect to  $w_l$  is computed as:

$$\begin{aligned} \nabla_{w_l} \mathbb{E}_{q_\theta(\mathbf{v}_H)} [\log p(\mathbf{v}_{(h,r,t)} | \mathbf{v}_{\text{MB}(h,r,t)})] &\simeq \nabla_{w_l} \mathbb{E}_{q_\theta(\mathbf{v}_{(h,r,t)})} [\log p(\mathbf{v}_{(h,r,t)} | \hat{\mathbf{v}}_{\text{MB}(h,r,t)})] \\ &= \nabla_{w_l} [q_\theta(\mathbf{v}_{(h,r,t)} = 1) \log p(\mathbf{v}_{(h,r,t)} = 1 | \hat{\mathbf{v}}_{\text{MB}(h,r,t)}) + q_\theta(\mathbf{v}_{(h,r,t)} = 0) \log p(\mathbf{v}_{(h,r,t)} = 0 | \hat{\mathbf{v}}_{\text{MB}(h,r,t)})] \\ &= \nabla_{w_l} [q_\theta(\mathbf{v}_{(h,r,t)} = 1) \log \sigma(w_l + b) + q_\theta(\mathbf{v}_{(h,r,t)} = 0) \log(1 - \sigma(w_l + b))] \\ &= q_\theta(\mathbf{v}_{(h,r,t)} = 1) \frac{\sigma(w_l + b)(1 - \sigma(w_l + b))}{\sigma(w_l + b)} - q_\theta(\mathbf{v}_{(h,r,t)} = 0) \frac{\sigma(w_l + b)(1 - \sigma(w_l + b))}{1 - \sigma(w_l + b)} \\ &= q_\theta(\mathbf{v}_{(h,r,t)} = 1) - q_\theta(\mathbf{v}_{(h,r,t)} = 1) \sigma(w_l + b) - q_\theta(\mathbf{v}_{(h,r,t)} = 0) \sigma(w_l + b) = q_\theta(\mathbf{v}_{(h,r,t)} = 1) - \sigma(w_l + b) \\ &= q_\theta(\mathbf{v}_{(h,r,t)} = 1) - p_w(\mathbf{v}_{(h,r,t)} = 1 | \hat{\mathbf{v}}_{\text{MB}(h,r,t)}). \end{aligned} \quad (6)$$

### 34 1.3 Statistics of the Datasets

35 The statistics of the four datasets are presented in Tab. 1.

Table 1: Dataset statistics.

| Dataset   | # Entities | # Relations | # Training | # Validation | # Test |
|-----------|------------|-------------|------------|--------------|--------|
| FB15k     | 14,951     | 1,345       | 483,142    | 50,000       | 59,071 |
| WN18      | 40,943     | 18          | 141,442    | 5,000        | 5,000  |
| FB15k-237 | 14,541     | 237         | 272,115    | 17,535       | 20,466 |
| WN18RR    | 40,943     | 11          | 86,835     | 3,034        | 3,134  |

Table 2: The best hyperparameter setting of pLogicNet on several benchmarks.

| Dataset   | Embedding Dimension | Batch Size | # Negative Samples | $\alpha$ | $\gamma$ | Learning Rate |
|-----------|---------------------|------------|--------------------|----------|----------|---------------|
| FB15k     | 1000                | 2048       | 128                | 1.0      | 24       | 0.0001        |
| WN18      | 500                 | 512        | 1024               | 0.5      | 12       | 0.0001        |
| FB15k-237 | 1000                | 1024       | 256                | 1.0      | 9        | 0.00005       |
| WN18RR    | 500                 | 512        | 1024               | 0.5      | 6        | 0.00005       |

## 1.4 Hyperparameters

In pLogicNet, we parameterize the variational distribution  $q_\theta$  as a TransE model [1], and we use the method as used in [3] for training the model. More specifically, we define  $q_\theta(\mathbf{v}_{(h,r,t)})$  by using a distance-based formulation, i.e.,  $q_\theta(\mathbf{v}_{(h,r,t)} = 1) = \sigma(\gamma - \|\mathbf{x}_h + \mathbf{x}_r - \mathbf{x}_t\|)$ , where  $\sigma$  is the sigmoid function and  $\gamma$  is a hyperparameter, which is fixed during training. We generate negative samples by using self-adversarial negative sampling [3], and use Adam [2] as the optimizer. The detailed parameter settings can be found in Tab. 2.

## References

- [1] A. Bordes, N. Usunier, A. Garcia-Duran, J. Weston, and O. Yakhnenko. Translating embeddings for modeling multi-relational data. In *NIPS*, 2013.
- [2] D. P. Kingma and J. Ba. Adam: A method for stochastic optimization. In *ICLR*, 2014.
- [3] Z. Sun, Z.-H. Deng, J.-Y. Nie, and J. Tang. Rotate: Knowledge graph embedding by relational rotation in complex space. *ICLR*, 2019.
